# Supplementary material for: The active core microbiota of two high-yielding laying hen breeds fed with different levels of calcium and phosphorus
Source: Front Physiol. 2022 Sep 23;13:951350. doi: 10.3389/fphys.2022.951350 (PMC9539745; doi:10.3389/fphys.2022.951350)
Supplement: Supplementary file 1 [file Table1.XLSX]

## Sheet: S1 Genera BreedGS
S1. Significant differences at genus level between breeds and GIT sections within the breeds
ONLY SIGNIFICANT RESULTS ARE SHOWN
Uncl. Lachnospiraceae
Level	- Level	Score Mean Difference	Std Err Dif	Z	p-Value	Hodges-Lehmann	Lower CL	Upper CL	Difference Plot
LSLGizzard	LSLCrop	32.0519	6.9803	4.59177	0.0002	4.12354	0.9253	23.0423	++
LSLDuodenum	LSLCaeca	-21.5953	6.44638	-3.34999	0.0278	-4.51668	-6.9711	-0.4148	---
LSLIleum	LBIleum	-24.0977	6.97632	-3.45422	0.0197	-3.04844	-6.9825	-0.2658	--
LSLIleum	LSLCaeca	-33.6433	6.8133	-4.93789	<.0001	-4.91104	-6.9713	-2.3244	---
LSLCrop	LBCrop	-46.0192	7.02523	-6.55055	<.0001	-5.67355	-9.0316	-3.0259	---
LSLCrop	LSLCaeca	-53.2239	6.89398	-7.72035	<.0001	-6.70085	-8.1804	-5.0754	----
Uncl. Lactobacillaceae
Level	- Level	Score Mean Difference	Std Err Dif	Z	p-Value	Hodges-Lehmann	Lower CL	Upper CL	Difference Plot
LSLIleum	LBIleum	63.5479	6.97632	9.10908	<.0001	17.6486	13.5384	21.9826	+++++++++
LSLCrop	LSLCaeca	62.453	6.89398	9.05907	<.0001	22.7099	18.4058	27.4289	+++++++++++
LSLIleum	LSLCaeca	60.738	6.8133	8.91462	<.0001	14.7124	10.5297	18.6949	+++++++
LSLCrop	LBCrop	54.1314	7.02523	7.70528	<.0001	20.4008	14.0546	25.9303	++++++++++
LSLGizzard	LBGizzard	45.6478	6.73763	6.77506	<.0001	13.7005	6.0651	21.0126	+++++++
LSLDuodenum	LBDuodenum	38.5723	6.33014	6.09343	<.0001	11.9107	4.9406	19.2937	++++++
LSLGizzard	LSLCaeca	30.5411	6.76064	4.51749	0.0003	11.2841	2.0811	17.6302	+++++
LSLDuodenum	LSLCaeca	27.9709	6.44638	4.33901	0.0006	10.4235	2.2012	16.4094	+++++
LSLIleum	LSLCrop	-26.0108	7.02523	-3.70249	0.0081	-7.2809	-13.3883	-1.1882	----
LBDuodenum	LBCrop	-29.7027	6.72696	-4.41548	0.0004	-4.6002	-7.8919	-1.2667	--
LBDuodenum	LBCaeca	-29.7322	6.56064	-4.5319	0.0003	-4.1188	-5.7212	-1.4407	--
LSLGizzard	LSLCrop	-31.0852	6.9803	-4.45328	0.0004	-11.3597	-19.1949	-3.4624	-----
LBIleum	LBCrop	-32.2912	6.97632	-4.62869	0.0002	-4.1628	-7.4669	-1.4112	--
LBGizzard	LBCrop	-33.1522	6.7912	-4.88165	<.0001	-4.6728	-8.0943	-1.6594	--
LBGizzard	LBCaeca	-33.8188	6.63344	-5.09822	<.0001	-3.7467	-5.3823	-1.3799	--
LSLDuodenum	LSLCrop	-34.5207	6.72111	-5.13616	<.0001	-12.3386	-19.9543	-4.9933	------
LBIleum	LBCaeca	-36.0771	6.83998	-5.27445	<.0001	-3.2582	-4.6985	-1.5754	--
Lactobacillus
Level	- Level	Score Mean Difference	Std Err Dif	Z	p-Value	Hodges-Lehmann	Lower CL	Upper CL	Difference Plot
LSLIleum	LBIleum	55.7406	6.97632	7.98997	<.0001	13.5899	9.4311	17.711	++++++
LSLIleum	LSLGizzard	36.4438	6.90479	5.27805	<.0001	7.9462	3.5542	12.4338	++++
LSLDuodenum	LSLCaeca	36.439	6.44638	5.65263	<.0001	11.6596	5.2918	19.4367	+++++
LSLCrop	LBCrop	33.4153	7.02523	4.75647	<.0001	7.4147	2.7108	12.0991	+++
LSLDuodenum	LSLCrop	33.193	6.72111	4.93862	<.0001	11.7413	4.2866	19.7022	+++++
LSLGizzard	LBGizzard	31.05	6.73763	4.60845	0.0002	6.432	2.2845	10.5736	+++
LSLIleum	LSLCaeca	30.8264	6.8133	4.52444	0.0003	5.0657	1.7979	8.2329	++
LSLDuodenum	LBDuodenum	26.2143	6.33014	4.14119	0.0014	13.4672	3.5517	22.6252	++++++
LSLIleum	LSLCrop	21.1653	7.02523	3.01275	0.0776	4.2319	-0.215	8.8423	++
LSLIleum	LSLDuodenum	-20.7613	6.62777	-3.13248	0.0549	-7.3195	-15.4143	0.1515	---
LBIleum	LBDuodenum	-23.6086	6.75547	-3.49474	0.0171	-6.9797	-13.9234	-0.6551	---
LBGizzard	LBDuodenum	-25.7939	6.5338	-3.94777	0.0032	-8.2719	-14.7073	-1.4201	----
LBCrop	LBCaeca	-30.3327	6.8133	-4.45198	0.0004	-6.1439	-9.9593	-1.9115	---
LSLGizzard	LSLDuodenum	-40.1848	6.56646	-6.11971	<.0001	-15.3029	-23.4674	-7.9967	-------
LBIleum	LBCaeca	-46.2901	6.83998	-6.76757	<.0001	-7.8625	-10.5309	-4.871	----
LBGizzard	LBCaeca	-48.8425	6.63344	-7.36308	<.0001	-8.481	-11.3688	-5.2858	----
Ligilactobacillus
Level	- Level	Score Mean Difference	Std Err Dif	Z	p-Value	Hodges-Lehmann	Lower CL	Upper CL	Difference Plot
LBIleum	LBDuodenum	58.507	6.75547	8.66068	<.0001	13.6285	9.0037	22.1567	++++++++
LBIleum	LBGizzard	55.0546	6.81833	8.0745	<.0001	13.0311	8.1248	20.9274	+++++++
LSLIleum	LSLGizzard	40.3319	6.90479	5.84115	<.0001	3.588	1.8402	5.2719	++
LBIleum	LBCrop	36.1534	6.97632	5.18231	<.0001	7.8283	2.9674	15.2162	++++
LSLIleum	LSLDuodenum	31.9514	6.62777	4.82084	<.0001	2.846	0.9859	4.5434	++
LBIleum	LBCaeca	27.5086	6.83998	4.02174	0.0023	5.4913	1.1532	13.8391	+++
LSLDuodenum	LSLCrop	-25.4119	6.72111	-3.78091	0.0061	-1.9902	-3.9428	-0.3352	-
LSLGizzard	LSLCrop	-34.0681	6.9803	-4.88061	<.0001	-2.7469	-4.5609	-1.0403	--
LSLCrop	LBCrop	-34.3681	7.02523	-4.89209	<.0001	-3.4993	-5.981	-1.2416	--
LBGizzard	LBCrop	-36.7529	6.7912	-5.41184	<.0001	-4.9879	-7.744	-2.261	---
LBDuodenum	LBCrop	-45.222	6.72696	-6.7225	<.0001	-5.8083	-8.1964	-3.3493	---
LSLIleum	LSLCaeca	-45.2304	6.8133	-6.63855	<.0001	-4.5525	-6.3998	-2.6429	---
LBGizzard	LBCaeca	-48.1402	6.63344	-7.2572	<.0001	-6.993	-9.3727	-4.5063	----
LSLCrop	LSLCaeca	-51.4294	6.89398	-7.46004	<.0001	-5.2977	-7.2867	-3.4451	---
LBDuodenum	LBCaeca	-55.0381	6.56064	-8.38914	<.0001	-7.931	-9.8486	-5.6907	----
LSLDuodenum	LSLCaeca	-56.4813	6.44638	-8.7617	<.0001	-7.2652	-9.3506	-5.48	----
LSLGizzard	LSLCaeca	-59.1541	6.76064	-8.74978	<.0001	-8.0298	-10.0088	-6.2226	----

## Sheet: S2 Global test
S2. Global test
PERMANOVA table of results. only statistical significant results are shown
						Unique
Source	df	SS	MS	Pseudo-F	P(perm)	perms
Breed	1	111620	111620	67.554	0.0001	9913
Bodyside	9	792310	88035	53.28	0.0001	9832
Calcium	1	3533.3	3533.3	2.1384	0.0334	9936
Phosphorus	1	4804.2	4804.2	2.9076	0.0071	9921
BreedxBodyside	9	80443	8938.1	5.4095	0.0001	9810
BreedxCalcium	1	4732.3	4732.3	2.8641	0.0071	9916
BreedxPhosphorus	1	2698.6	2698.6	1.6332	0.0942	9920
CalciumxPhosphorus	1	4087.1	4087.1	2.4736	0.0157	9911
BreedxCalciumxPhosphorus	1	4894.8	4894.8	2.9624	0.0076	9927
Res	598	988070	1652.3
Total	677	2091300
CROP
PERMANOVA table of results						Unique
Source	df	SS	MS	Pseudo-F	P(perm)	perms
Calcium	1	2476.5	2476.5	2.5901	0.052	999
Breed	1	42527	42527	44.477	0.001	999
CalciumxBreed	1	2173.4	2173.4	2.2731	0.082	999
Res	139	132900	956.14
Total	146	185150
GIZZARD
PERMANOVA table of results						Unique
Source	df	SS	MS	Pseudo-F	P(perm)	perms
Breed	1	30075	30075	11.287	0.001	996
Res	127	338390	2664.5
Total	134	383950
DUODENUM
PERMANOVA table of results						Unique
Source	df	SS	MS	Pseudo-F	P(perm)	perms
Breed	1	29185	29185	12.355	0.001	997
Res	111	262210	2362.3
Total	118	307600
ILEUM
PERMANOVA table of results						Unique
Source	df	SS	MS	Pseudo-F	P(perm)	perms
Breed	1	62051	62051	39.646	0.001	998
Res	137	214420	1565.1
Total	144	287550
CAECA
PERMANOVA table of results						Unique
Source	df	SS	MS	Pseudo-F	P(perm)	perms
Phosphor	1	3422.1	3422.1	2.0072	0.002	997
Calcium	1	4280.2	4280.2	2.5105	0.001	998
Breed	1	15601	15601	9.1507	0.001	997
PhosphorusxCalcium	1	2425.7	2425.7	1.4228	0.052	998
PhosphorusxBreed	1	2291.8	2291.8	1.3443	0.079	999
CalciumxBreed	1	4170.4	4170.4	2.4461	0.001	998
PhosphorusxCalciumxBreed	1	2687.8	2687.8	1.5765	0.022	999
Res	124	211410	1704.9
Total	131	246160

## Sheet: S3 Overview
S3. Anosim summary of supplementation effect (red), breed effect (green/blue) at ASV level
e.g. LB P+ caeca samples are significantly different from LB P- caeca samples
Phosporus	LSL P+	LSL P-	LB P+	LB P-
LSL P+
LSL P-
LB P+	Cr,G,D,I,Cae
LB P-		Cr,G,D,I,Cae	Cae
Calcium	LSL Ca+	LSL Ca-	LB Ca+	LB Ca-
LSL Ca+
LSL Ca-	Cae
LB Ca+	Cr,G,D,I,Cae
LB Ca-		Cr,G,D,I,Cae	Cr,Cae
Crop	Pairwise Tests	R	Significance	Possible	Actual	Number >=
	Groups	Statistic	Level %	Permutations	Permutations	Observed	p value	p.adj
	LBCropCa-, LBCropCa+	0.079	0.3	Very large	999	2	0.003	0.0036
	LBCropCa-, LSLCropCa-	0.581	0.1	Very large	999	0	0.001	0.003
	LBCropCa+, LSLCropCa+	0.257	0.1	Very large	999	0	0.001	0.002
	LBCropP+, LSLCropP+	0.378	0.1	Very large	999	0	0.001	0.003
	LBCropP-, LSLCropP-	0.395	0.1	Very large	999	0	0.001	0.002
Gizzard	Pairwise Tests	R	Significance	Possible	Actual	Number >=
	Groups	Statistic	Level %	Permutations	Permutations	Observed	p value	p.adj
	LBGizzardP+, LSLGizzardP+	0.153	0.1	Very large	999	0	0.001	0.003
	LBGizzardP-, LSLGizzardP-	0.182	0.2	Very large	999	1	0.002	0.003
	LBGizzardCa-, LSLGizzardCa-	0.197	0.2	Very large	999	1	0.002	0.003
	LBGizzardCa+, LSLGizzardCa+	0.142	0.1	Very large	999	0	0.001	0.003
Duodenum	Pairwise Tests	R	Significance	Possible	Actual	Number >=
	Groups	Statistic	Level %	Permutations	Permutations	Observed	p value	p.adj
	LBDuodenumP+, LSLDuodenumP+	0.268	0.1	Very large	999	0	0.001	0.003
	LBDuodenumP-, LSLDuodenumP-	0.125	0.1	Very large	999	0	0.001	0.002
	LBDuodenumCa-, LSLDuodenumCa-	0.254	0.1	Very large	999	0	0.001	0.003
	LBDuodenumCa+, LSLDuodenumCa+	0.144	0.2	Very large	999	1	0.002	0.003
Ileum	Pairwise Tests	R	Significance	Possible	Actual	Number >=
	Groups	Statistic	Level %	Permutations	Permutations	Observed	p value	p.adj
	LBIleumP+, LSLIleumP+	0.436	0.1	Very large	999	0	0.001	0.003
	LBIleumP-, LSLIleumP-	0.535	0.1	Very large	999	0	0.001	0.002
	LBIleumCa-, LSLIleumCa-	0.498	0.1	Very large	999	0	0.001	0.003
	LBIleumCa+, LSLIleumCa+	0.492	0.1	Very large	999	0	0.001	0.002
Caeca	Pairwise Tests	R	Significance	Possible	Actual	Number >=
	Groups	Statistic	Level %	Permutations	Permutations	Observed	p value	p.adj
	LBCaecaP+, LBCaecaP-	0.056	0.6	Very large	999	5	0.006	0.0072
	LBCaecaP+, LSLCaecaP+	0.243	0.1	Very large	999	0	0.001	0.003
	LBCaecaP-, LSLCaecaP-	0.344	0.1	Very large	999	0	0.001	0.002
	LBCaecaCa-, LSLCaecaCa-	0.339	0.1	Very large	999	0	0.001	0.003
	LBCaecaCa+, LSLCaecaCa+	0.327	0.1	Very large	999	0	0.001	0.002
	LSLCaecaCa+, LSLCaecaCa-	0.169	0.1	Very large	999	0	0.001	0.0012

## Sheet: S4 Pathways Caeca
S4. PERMANOVA table of results : Functional prediction - Pathways
ONLY SIGNIFICANT RESULTS ARE SHOWN
							Unique
Source		df	SS	MS	Pseudo-F	P(perm)	perms
breed		1	7.0111	7.0111	3.3904	0.02	998
breedxPhosphorus		1	5.3792	5.3792	2.6012	0.05	999
Res		124	256.43	2.068
Total		131	280.28
ko02010	ABC transporters		Membrane transport		Environmental Information Processing					breed effect
Level	- Level	Score Mean Difference	Std Err Dif	Z	p-Value	Hodges-Lehmann	Lower CL	Upper CL	Difference Plot
LSL_P+Ca-	LB_P+Ca-	10.7917	3.5	3.08333	0.0428	0.00182	9.2e-05	0.0036202	+++++++
ko00190	Oxidative phosphorylation		Energy metabolism		Metabolism					breed effect
Level	- Level	Score Mean Difference	Std Err Dif	Z	p-Value	Hodges-Lehmann	Lower CL	Upper CL	Difference Plot
LSLP-Ca-	LBP-Ca-	-10.355	3.28139	-3.15569	0.0343	-0.00019	-0.000388	-1.5e-05	-----
Functions
Steel-Dwass test
K06607	myo-inositol catabolism protein IolS [EC:1,1,1,-]						Ca. Breed. P
Level	- Level	Score Mean Difference	Std Err Dif	Z	p-Value	Hodges-Lehmann	Lower CL	Upper CL	Difference Plot
LSLP-Ca+	LSLP-Ca-	11.4921	3.34284	3.43781	0.0136	2.8e-05	2.83e-06	7.8e-05	++++
LSLP-Ca-	LBP-Ca-	-10.355	3.28139	-3.15569	0.0343	-2.8e-05	-8.1e-05	-6.6e-07	----
LSLP-Ca-	LSLP+Ca-	-11.2321	3.47011	-3.23683	0.0266	-4.7e-05	-9.5e-05	-3.31e-06	-------
k22230	scyllo-inositol 2-dehydrogenase (NADP+) [EC:1,1,1,-]						Ca. Breed
Level	- Level	Score Mean Difference	Std Err Dif	Z	p-Value	Hodges-Lehmann	Lower CL	Upper CL	Difference Plot
LSLP-Ca+	LSLP-Ca-	10.2222	3.34254	3.05822	0.0461	2.3e-05	-4.2e-07	4.7e-05	+++++
LBP-Ca+	LBP-Ca-	-9.7738	3.24351	-3.01333	0.0526	-2.7e-05	-5.9e-05	1e-07	-----
LSLP-Ca-	LBP-Ca-	-14.3929	3.28139	-4.38621	0.0003	-4.1e-05	-6.8e-05	-1.6e-05	--------
K01771	1-phosphatidylinositol phosphodiesterase [EC:4,6,1,13]						Breed effect
Level	- Level	Score Mean Difference	Std Err Dif	Z	p-Value	Hodges-Lehmann	Lower CL	Upper CL	Difference Plot
LSLP-Ca+	LBP+Ca+	-10.369	3.66196	-2.83155	0.0873	-5.665e-06	-1e-05	4.2e-07	----
LSLP-Ca+	LBP-Ca+	-11.5919	3.30931	-3.5028	0.0109	-9.645e-06	-1.8e-05	-1.66e-06	-------
k015521	D-inositol-3-phosphate glycosyltransferase [EC:2,4,1,250]						Breed effect
Level	- Level	Score Mean Difference	Std Err Dif	Z	p-Value	Hodges-Lehmann	Lower CL	Upper CL	Difference Plot
LSLP-Ca-	LBP-Ca-	-9.83403	3.28139	-2.99691	0.0552	-1.6e-05	-3.7e-05	1.2e-06	----
k17209	inositol transport system permease protein						Breed effect
Level	- Level	Score Mean Difference	Std Err Dif	Z	p-Value	Hodges-Lehmann	Lower CL	Upper CL	Difference Plot
LSLP-Ca+	LBP-Ca+	-11.062	3.30898	-3.34301	0.0188	-9.765e-06	-1.8e-05	-1.02e-06	-------
k17210	inositol transport system ATP-binding protein						Breed effect
Level	- Level	Score Mean Difference	Std Err Dif	Z	p-Value	Hodges-Lehmann	Lower CL	Upper CL	Difference Plot
LSLP-Ca+	LBP-Ca+	10.9295	3.30798	3.30398	0.0214	1.21e-06	5e-08	3.26e-06	++++
k17215	inositol transport system ATP-binding protein						Breed effect
Level	- Level	Score Mean Difference	Std Err Dif	Z	p-Value	Hodges-Lehmann	Lower CL	Upper CL	Difference Plot
LSLP-Ca+	LBP-Ca+	-11.062	3.30931	-3.34268	0.0188	-3e-05	-5.4e-05	-2.46e-06	------

## Sheet: S5 Core
S5. Relative abundance of core microbiota separated by gastrointestinal section, strain and sample type
		CROP		GIZZARD		DUODENUM		ILEUM		CAECA		ava. abu.
		LSL	LB	LSL	LB	LSL	LB	LSL	LB	LSL	LB	across all samples [%]
ASV62	uncl. Lactobacillus	30.16	11.46	11.46	18.615	3.925	17.44	6.345	23	5.115	1.05	12.857
ASV63	Megamonas funiformis	13.05	16	16	4.665	3.885	6.235	6.565	8.615	5.82	0.215	8.105
ASV137	Ligilactus salivarius	6.595	10.81	10.81	2.72	4.155	3.495	4.095	4.845	5.49	0.41	5.3425
ASV197	Lactobacillus helveticus	18.61	10.59	10.59	10.895	4.025	20.84	7.79	22.515	8.775	1.9	11.653
ASV561	uncl. Fuscatenibacter	2.815	2.07	2.07	0.89	0.47	1.135	0.75	1.42	0.615	0.12	1.2355
	sum [%]	71.23	50.93	50.93	37.785	16.46	49.145	25.545	60.395	25.815	3.695	39.193
Significant core bacteria changes between gastrointestinal sections and breed
ASV62												ASV137
Level	- Level	Score Mean Difference	Std Err Dif	Z	p-Value	Hodges-Lehmann	Lower CL	Upper CL	Difference Plot			Level	- Level	Score Mean Difference	Std Err Dif	Z	p-Value	Hodges-Lehmann	Lower CL	Upper CL	Difference Plot
LSLCrop	LSLCaeca	67.8082	6.89398	9.8359	<.0001	29.8016	25.9902	34.5665	+++++++++++++			LSLCrop	LSLCaeca	70.4858	6.89398	10.2242	<.0001	5.72023	4.1892	7.0426	++++++
LBCrop	LBCaeca	67.2431	6.8133	9.8694	<.0001	7.9867	5.7767	11.8364	+++			LBCrop	LBCaeca	68.9855	6.8133	10.1251	<.0001	8.70125	7.1287	11.2747	+++++++++
LSLIleum	LSLCaeca	67.1269	6.8133	9.8523	<.0001	21.5901	17.3271	25.5147	+++++++++			LSLIleum	LSLCaeca	68.9855	6.8133	10.1251	<.0001	4.28134	3.2007	5.2873	+++++
LBIleum	LBCaeca	66.0524	6.83998	9.6568	<.0001	3.8785	2.3436	5.2778	++			LBIleum	LBCaeca	65.9947	6.83998	9.6484	<.0001	4.35871	3.2947	5.4839	+++++
LSLIleum	LBIleum	63.6582	6.97632	9.1249	<.0001	17.6768	13.7394	22.2162	++++++++			LSLDuodenum	LSLCaeca	55.86	6.44638	8.6653	<.0001	2.77287	1.9948	3.8163	+++
LSLGizzard	LSLCaeca	61.5385	6.76064	9.1025	<.0001	17.5979	8.3545	22.9235	++++++++			LBDuodenum	LBCaeca	51.2845	6.56064	7.817	<.0001	2.48058	1.5159	4.1893	+++
LSLDuodenum	LSLCaeca	55.6966	6.44638	8.64	<.0001	17.1439	8.6838	22.9589	++++++++			LSLGizzard	LSLCaeca	49.5576	6.76064	7.3303	<.0001	2.07764	0.9222	3.0667	++
LBDuodenum	LBCaeca	53.7869	6.56064	8.1984	<.0001	2.9317	1.4034	5.5139	+			LBGizzard	LBCaeca	42.6437	6.63344	6.4286	<.0001	2.28571	1.0966	4.5535	++
LSLCrop	LBCrop	53.3692	7.02523	7.5968	<.0001	20.56	14.0045	26.0562	+++++++++			LSLIleum	LSLGizzard	34.6688	6.90479	5.021	<.0001	2.02669	0.7758	3.2679	++
LBGizzard	LBCaeca	50.2777	6.63344	7.5794	<.0001	2.2975	1.0852	4.3249	+			LBIleum	LBGizzard	20.5909	6.81833	3.0199	0.076	1.74297	-0.0909	3.4865	++
LSLGizzard	LBGizzard	49.0599	6.73763	7.2815	<.0001	13.6187	6.3672	21.0071	++++++			LSLIleum	LSLDuodenum	19.6298	6.62777	2.9617	0.0893	1.23289	-0.0742	2.5979	+
LSLCaeca	LBCaeca	45.9545	6.65833	6.9018	<.0001	0.6222	0.3428	0.968				LSLIleum	LSLCrop	-21.6008	7.02523	-3.0748	0.065	-1.384	-2.8787	0.0366	-
LSLDuodenum	LBDuodenum	35.7101	6.33014	5.6413	<.0001	11.7793	4.6641	19.1122	+++++			LSLDuodenum	LSLCrop	-36.1263	6.72111	-5.3751	<.0001	-2.59807	-4.283	-1.0952	---
LSLIleum	LSLCrop	-25.1125	7.02523	-3.5746	0.0129	-7.3113	-13.4394	-1.0655	---			LSLCrop	LBCrop	-37.0358	7.02523	-5.2718	<.0001	-3.57701	-5.9657	-1.5086	----
LBDuodenum	LBCrop	-29.9429	6.72696	-4.4512	0.0004	-4.354	-7.8092	-1.23	--			LBIleum	LBCrop	-44.2918	6.97632	-6.3489	<.0001	-4.45376	-6.8604	-2.3808	-----
LSLGizzard	LSLCrop	-32.4938	6.9803	-4.6551	0.0001	-12.171	-19.9728	-3.9989	-----			LSLGizzard	LSLCrop	-47.7948	6.9803	-6.8471	<.0001	-3.37676	-4.9013	-1.9749	----
LBIleum	LBCrop	-33.4223	6.97632	-4.7908	<.0001	-4.1638	-7.4793	-1.4018	--			LBDuodenum	LBCrop	-49.1844	6.72696	-7.3115	<.0001	-5.93467	-8.2648	-3.7799	------
LSLDuodenum	LSLCrop	-34.2737	6.72111	-5.0994	<.0001	-12.5267	-20.4645	-5.1374	-----			LBGizzard	LBCrop	-49.9552	6.7912	-7.3559	<.0001	-6.17667	-8.5919	-3.9353	-------
LBGizzard	LBCrop	-39.7973	6.7912	-5.8601	<.0001	-5.3311	-8.6619	-2.3541	--
												ASV197
ASV63												Level	- Level	Score Mean Difference	Std Err Dif	Z	p-Value	Hodges-Lehmann	Lower CL	Upper CL	Difference Plot
Level	- Level	Score Mean Difference	Std Err Dif	Z	p-Value	Hodges-Lehmann	Lower CL	Upper CL	Difference Plot			LSLCrop	LSLCaeca	67.2955	6.89398	9.7615	<.0001	16.9408	13.989	19.8249	++++++++++
LBCrop	LBCaeca	68.9855	6.8133	10.1251	<.0001	14.6195	11.3923	18.2118	++++++++++			LSLIleum	LSLCaeca	66.8074	6.8133	9.8054	<.0001	21.1764	18.2415	24.0946	++++++++++++
LSLCrop	LSLCaeca	68.8906	6.89398	9.9929	<.0001	11.3154	8.4244	15.4106	++++++++			LBIleum	LBCaeca	65.4754	6.83998	9.5725	<.0001	7.6997	5.1753	9.4788	+++++
LSLIleum	LSLCaeca	67.2431	6.8133	9.8694	<.0001	7.3982	4.569	10.4522	+++++			LBCrop	LBCaeca	61.798	6.81329	9.0702	<.0001	8.5818	4.4492	11.2758	+++++
LBIleum	LBCaeca	66.8891	6.83998	9.7791	<.0001	4.9163	2.7527	6.3941	+++			LSLIleum	LBIleum	59.2166	6.97632	8.4882	<.0001	14.0921	10.2684	17.9391	++++++++
LSLDuodenum	LSLCaeca	57.5112	6.44637	8.9215	<.0001	4.5442	2.88	7.6428	+++			LSLDuodenum	LSLCaeca	58.7699	6.44638	9.1167	<.0001	19.0758	13.1218	23.4892	+++++++++++
LSLGizzard	LSLCaeca	57.0935	6.76064	8.445	<.0001	2.9677	1.1423	5.1055	++			LBDuodenum	LBCaeca	50.8152	6.56064	7.7455	<.0001	5.9741	3.228	8.0657	++++
LBDuodenum	LBCaeca	53.349	6.5606	8.1317	<.0001	4.6267	2.1085	5.5211	+++			LSLGizzard	LSLCaeca	47.232	6.76064	6.9863	<.0001	8.4774	2.8374	12.8483	+++++
LBGizzard	LBCaeca	46.3997	6.63344	6.9948	<.0001	1.744	0.5044	4.2108	+			LSLCaeca	LBCaeca	45.7727	6.65833	6.8745	<.0001	1.2484	0.7718	1.6588	+
LSLIleum	LSLGizzard	29.7101	6.90479	4.3028	0.0007	3.5733	0.8718	6.8496	++			LSLIleum	LSLGizzard	45.0089	6.90479	6.5185	<.0001	11.6901	7.3053	16.8763	+++++++
LBIleum	LBGizzard	24.0809	6.81833	3.5318	0.0151	1.8346	0.1771	4.573	+			LSLDuodenum	LBDuodenum	40.4243	6.33014	6.386	<.0001	13.3246	7.0384	18.9753	++++++++
LSLIleum	LSLCrop	-22.1997	7.02523	-3.16	0.0506	-3.8763	-7.7109	0.0129	---			LSLCrop	LBCrop	40.1664	7.02523	5.7174	<.0001	9.0513	4.5995	13.3489	+++++
LSLDuodenum	LSLCrop	-34.0575	6.72111	-5.0672	<.0001	-6.0098	-9.8581	-2.428	----			LBIleum	LBGizzard	37.9536	6.81833	5.5664	<.0001	4.7688	1.9321	7.595	+++
LSLGizzard	LSLCrop	-47.27	6.9803	-6.7719	<.0001	-7.7415	-11.0842	-4.2815	-----			LSLGizzard	LBGizzard	36.45	6.73763	5.4099	<.0001	5.7275	1.9546	11.5299	+++
LBDuodenum	LBCrop	-47.8336	6.72693	-7.1108	<.0001	-9.4728	-13.2425	-6.0848	------			LBGizzard	LBCaeca	32.9179	6.63343	4.9624	<.0001	1.6717	0.3413	3.374	+
LBIleum	LBCrop	-54.6647	6.97632	-7.8358	<.0001	-9.4035	-12.9814	-6.112	------			LSLIleum	LSLCrop	19.8858	7.02523	2.8306	0.1261	3.7484	-0.4796	8.0833	++
LBGizzard	LBCrop	-58.4738	6.7912	-8.6102	<.0001	-11.2746	-14.8869	-8.5388	--------			LBIleum	LBDuodenum	10.8424	6.75547	1.605	0.8462	1.4454	-1.5779	4.643	+
												LSLIleum	LSLDuodenum	6.9624	6.62777	1.0505	0.9891	1.894	-3.9734	7.7166	+
ASV561												LSLDuodenum	LSLCrop	6.6077	6.72111	0.9831	0.9932	1.9372	-4.0331	7.8536	+
Level	- Level	Score Mean Difference	Std Err Dif	Z	p-Value	Hodges-Lehmann	Lower CL	Upper CL	Difference Plot			LBIleum	LBCrop	-5.2554	6.97632	-0.7533	0.9991	-0.8344	-4.6556	2.7454
LSLCrop	LSLCaeca	70.4858	6.89398	10.2242	<.0001	2.19119	1.78866	2.68606	+++++++++++			LBDuodenum	LBCrop	-13.0128	6.72696	-1.9344	0.6453	-2.0313	-6.282	1.3997	-
LBCrop	LBCaeca	68.9855	6.81322	10.1252	<.0001	1.76887	1.31523	2.26483	+++++++++			LBGizzard	LBDuodenum	-24.6594	6.5338	-3.7741	0.0062	-3.0678	-6.2389	-0.3884	--
LBIleum	LBCaeca	66.3121	6.8399	9.6949	<.0001	0.47405	0.34734	0.65393	++			LSLGizzard	LSLDuodenum	-31.941	6.56646	-4.8643	<.0001	-9.6481	-16.2082	-3.506	------
LSLIleum	LSLCaeca	66.1976	6.8133	9.7159	<.0001	1.28201	1.11198	1.473	++++++			LSLGizzard	LSLCrop	-35.7252	6.9803	-5.118	<.0001	-8.1199	-12.8047	-3.3464	-----
LSLIleum	LBIleum	54.0302	6.97632	7.7448	<.0001	0.83697	0.56635	1.0833	++++			LBGizzard	LBCrop	-37.2359	6.79119	-5.483	<.0001	-4.9453	-9.4563	-2.1304	---
LBDuodenum	LBCaeca	52.9736	6.56046	8.0747	<.0001	0.50687	0.22728	0.745	+++
LSLGizzard	LSLCaeca	49.1602	6.76063	7.2715	<.0001	0.63335	0.26117	1.00751	+++
LSLDuodenum	LSLCaeca	49.1085	6.44637	7.618	<.0001	1.01856	0.59152	1.34909	+++++
LBGizzard	LBCaeca	44.8118	6.63313	6.7557	<.0001	0.27062	0.08644	0.52938	+
LSLCaeca	LBCaeca	32.7424	6.65815	4.9176	<.0001	0.06439	0.02129	0.10442
LSLIleum	LSLGizzard	30.0764	6.90479	4.3559	0.0006	0.61188	0.18748	0.98952	+++
LSLGizzard	LBGizzard	24.4335	6.73759	3.6264	0.0107	0.31311	0.03649	0.75717	++
LSLDuodenum	LBDuodenum	21.1129	6.33013	3.3353	0.0292	0.47364	0.01471	0.94742	++
LSLIleum	LSLCrop	-41.8269	7.02523	-5.9538	<.0001	-0.94786	-1.50541	-0.45622	-----
LSLDuodenum	LSLCrop	-43.1354	6.72111	-6.4179	<.0001	-1.29546	-1.96609	-0.69689	------
LBDuodenum	LBCrop	-51.2256	6.72696	-7.615	<.0001	-1.19962	-1.71226	-0.8465	------
LSLGizzard	LSLCrop	-54.9205	6.9803	-7.8679	<.0001	-1.53276	-2.13551	-1.00184	--------
LBGizzard	LBCrop	-61.8403	6.79119	-9.106	<.0001	-1.41218	-1.88521	-1.04684	-------
LBIleum	LBCrop	-63.9617	6.97632	-9.1684	<.0001	-1.2433	-1.69799	-0.87465	------
